# Supplementary material
Source: Springer Nature journal article supplement (https://www.springermedizin.de/resource/supplementary/12873_2011_143_MOESM4_ESM.pdf/9431540)

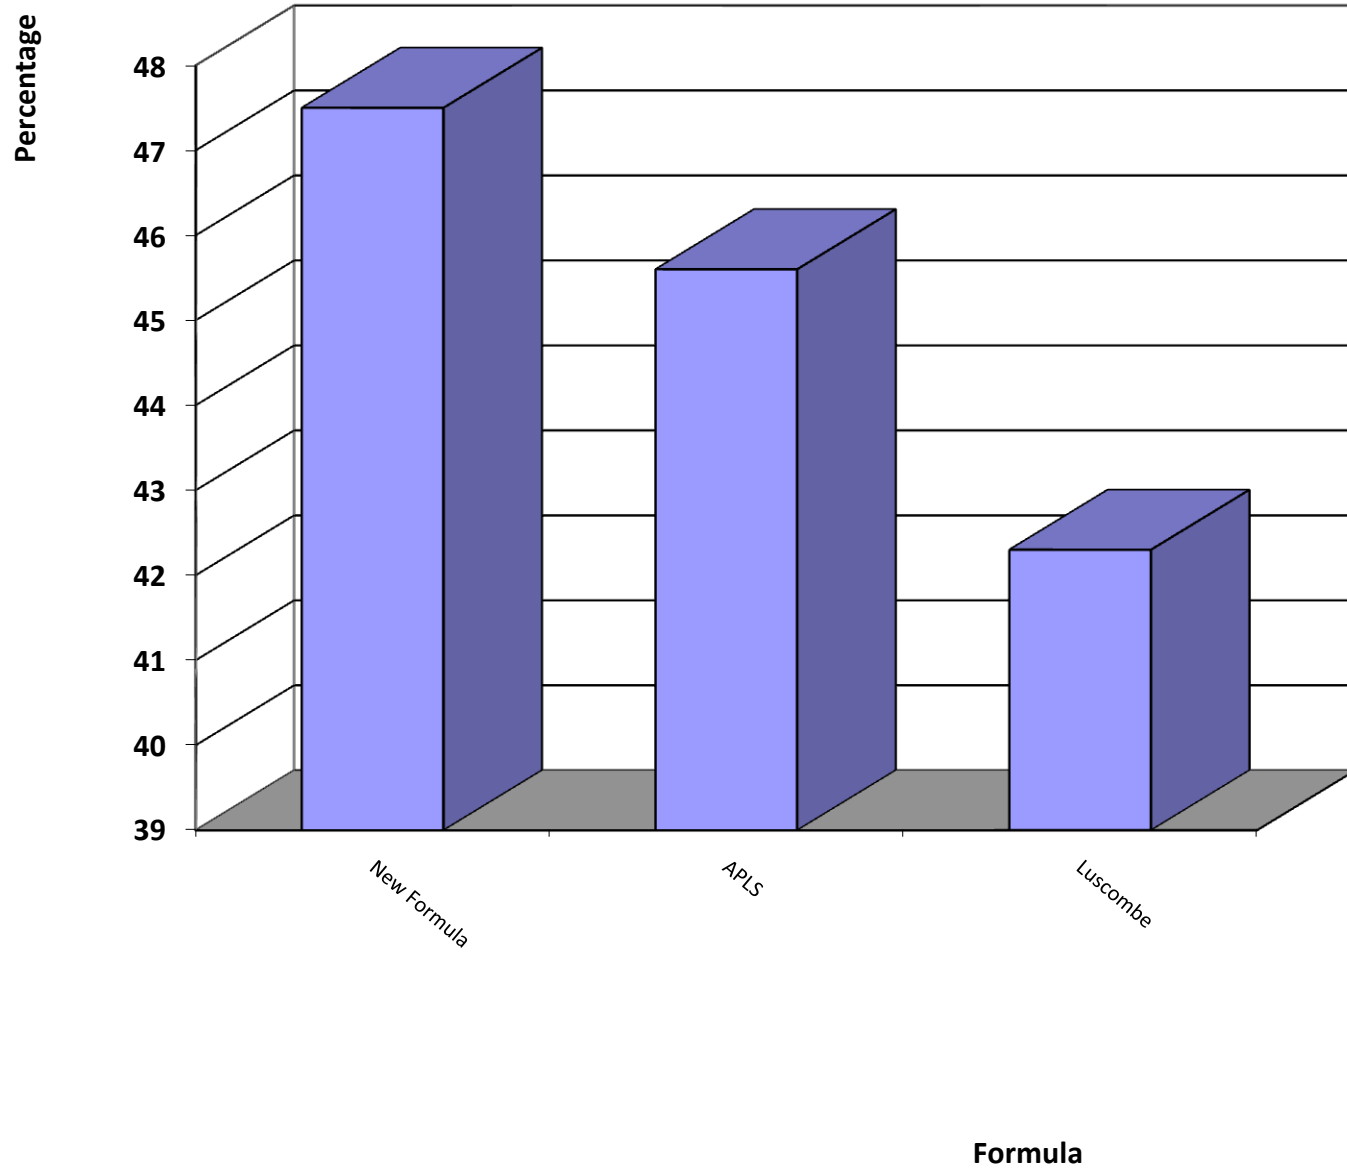

Supplement: MOESM4 [file 9431540]
